# Supplementary material for: Nearshore Pelagic Influence at the SW Margin of the Paratethys Sea—Examples from the Miocene of Croatia
Source: MDPI journal article supplement (doi:10.3390/geosciences12030120), 2022-03-04
Supplement: s1 [file s1]

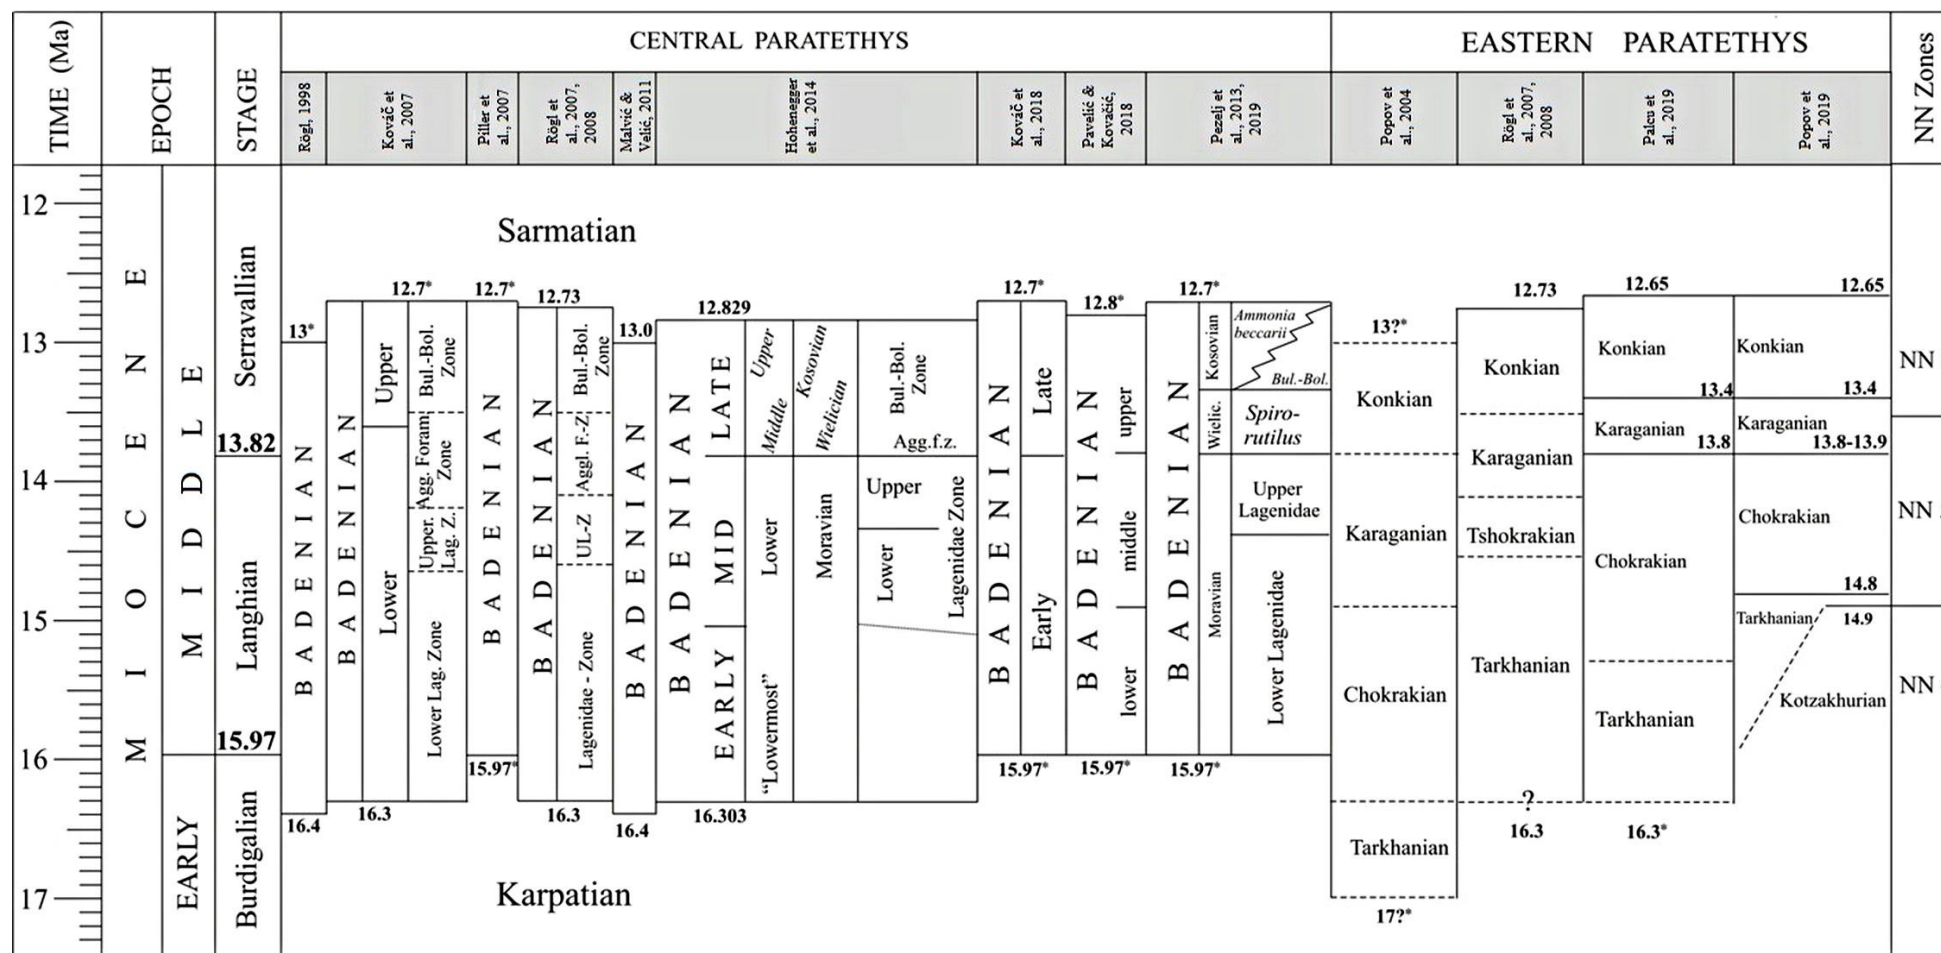

**Figure S1.** A detailed stratigraphic division of the Badenian Stage in the Central and Eastern Paratethys, with the absolute age of the Langhian/Serravallian, Karpatian/Badenian and Badenian/Sarmatian boundaries, proposed by the various authors. Asterisks (\*) point to the ages derived from figures, not explicitly written in papers ([2, 4, 21, 25, 26, 34, 151, 160, 164, 175]).
